# Supplementary material for: Identification of Novel Oryza sativa miRNAs in Deep Sequencing-Based Small RNA Libraries of Rice Infected with Rice Stripe Virus
Source: PLoS One. 2012 Oct 10;7(10):e46443. doi: 10.1371/journal.pone.0046443 (PMC3468594; doi:10.1371/journal.pone.0046443)
Supplement: Table S1 — sRNAs used for analysis here. (XLS) [file pone.0046443.s002.xls]

## Sheet: Sheet1
Serial no.	length	sequencing reads	sequence
Seq1	21	140	TTTGGATTGAAGGGAGCTCTG
Seq2	21	121	TGCCTGGCTCCCTGTATGCCA
Seq3	21	118	TGCCTGGCTCCCTGAATGCCA
Seq4	21	572	TCGATAAACCTCTGCATCCAG
Seq5	21	1851	TGGAGAAGCAGGGCACGTGCA
Seq6	21	3647	TCGGACCAGGCTTCATTCCCC
Seq7	21	601	TCGGACCAGGCTTCATTCCTC
Seq8	21	318	TCGGACCAGGCTTCAATCCCT
Seq9	22	118012	TGAAGCTGCCAGCATGATCTGA
Seq10	21	24678	TGAAGCTGCCAGCATGATCTA
Seq11	21	83988	TCGCTTGGTGCAGATCGGGAC
Seq12	21	738	CAGCCAAGGATGACTTGCCGG
Seq13	21	342	TAGCCAAGGATGACTTGCCTG
Seq14	21	269	CAGCCAAGGATGACTTGCCGA
Seq15	21	350	TGATTGAGCCGTGCCAATATC
Seq16	21	9444	AGAATCTTGATGATGCTGCAT
Seq17	21	127	TTCCACAGCTTTCTTGAACTT
Seq18	21	1662	TCCACAGGCTTTCTTGAACTG
Seq19	21	286	TGCCAAAGGAGAGTTGCCCTG
Seq20	21	157	CTGCACTGCCTCTTCCCTGGC
Seq21	21	6725	TGCAGTTGTTGTCTCAAGCTT
Seq22	21	333	TGCAGTTGCTGCCTCAAGCTT
Seq23	21	439	TGTTGTCTCAAGCTTGCTGCC
Seq24	21	19789	TGGAAGGGGCATGCAGAGGAG
Seq25	21	2553	TGACAACGAGAGAGAGCACGC
Seq26	24	387	AAGACGGATGATTAAAGTTGGACA
Seq27	24	167	TATGAATGTGGGCAATGCTAGAAA
Seq28	21	950	TTAGATGACCATCAGCAAACA
Seq29	21	328	TGTAAAATTCATTCGTTCCAA
Seq30	21	722	TAGGATTCAATCCTTGCTGCT
Seq31	21	414	CAGCAAGAACTGGATCTTAAT
Seq32	21	140	TAAGATAATGCCATGAATTTG
Seq33	24	520	GTTGCACGGGTTTGTATGTTGCAG
Seq34	21	528	ATCAGGAGAGATGACACCGAC
Seq35	21	131	TGGAAAGTTGGGAGATTGGGG
Seq36	24	763	CTAGATTTGTTTATTTTGGGACGG
Seq37	24	253	AGCTCTGATACCATGTTAGATTAG
Seq38	24	114	TGCTGAATTAGACCTAGTGGGCAT
Seq39	24	103	AAAGTCAACGGTGTCATATATTTA
Seq40	21	194	TATTTTAGTTTCTATGGTCAC
Seq41	21	299	TTCTTGTGCTGCTGAAGAGAC
Seq42	24	199	AGCTTCTGACAGCTGCAGTTTCTC
Seq43	21	163	TTTGAGAAGGTATCATGAGAT
Seq44	21	124	TTGATAGAAGAGAGTGAGCAC
Seq45	23	135	TTTGGATTGAAGGGAGCTCTGAA
Seq46	21	109	TCGGACCAGGCTTCATTCTCC
Seq47	21	1109	TTCGGACCAGGCTTCATTCCC
Seq48	21	390	TCTCGGACCAGGCTTCATTCC
Seq49	21	114	TCTCGGATCAGGCTTCATTCC
Seq50	22	388	TGAAGTTGCCAGCATGATCTGA
Seq51	22	107	TGAAGCTGTTAGCATGATCTGA
Seq52	21	139	TGAAGTTGCCAGCATGATCTA
Seq53	21	308	TGAAGCTGTCAGCATGATCTA
Seq54	22	767	TGAAGCTGTCAGCATGATCTGA
Seq55	22	149	TGAAGCTGCCAGTATGATCTGA
Seq56	22	124	TGAAGCTGCCAGCATGCTCTGA
Seq57	22	106	TGAAGCTGCCAGCATTATCTGA
Seq58	22	758	TGAAGCTGCTAGCATGATCTGA
Seq59	22	237	TGAAGCTGCCAGCATGATTTGA
Seq60	22	207	TGAAGCTGCCAGCATAATCTGA
Seq61	22	139	TGAATCTGCCAGCATGATCTGA
Seq62	21	383	TGAAGCTGCTAGCATGATCTA
Seq63	22	103	TTAAGCTGCCAGCATGATCTGA
Seq64	21	547	TTGCTTGGTGCAGATCGGGAC
Seq65	21	233	TCGCTTGGTGCAGATCGGGAA
Seq66	21	167	TCGCTTGGTGCAGATCGGGCC
Seq67	21	164	TCGTTTGGTGCAGATCGGGAC
Seq68	21	160	TCGCTTGGTGCAGATCGGGTC
Seq69	21	123	TCGCTTGGTGCAGATTGGGAC
Seq70	21	163	TCGCTTGGTGCAGATCGGGAT
Seq71	21	283	TCGCTTGGTGCAGATCTGGAC
Seq72	21	103	AGAATTTTGATGATGCTGCAT
Seq73	21	2138	TTGAGTGCAGCGTTGATGAAC
Seq74	21	171	ATTGAGTGCAGCGTTGATGAA
Seq75	21	126	TGCAGTTGTTGTCTTAAGCTT
Seq76	21	131	TGCAGTTGTTGTTTCAAGCTT
Seq77	21	115	TGGAAGGGGCATGCAGAGGAA
Seq78	21	145	TGCATTTGCACCTGCACCTAC
Seq79	21	213	TGTGAGAAAAAGTCAACGGCG
Seq80	24	161	AAACATGTGAGAAAAAGTCAACGG
Seq81	21	669	TGAATGTGAGAAATGCTAGAA
Seq82	24	103	GATGATTAAAGTTGGACACGGAAA
Seq83	24	264	ATAAGACGGACAGTCAAAGTTGGA
Seq84	24	128	ATAAGACGGACAGTTAAAGTTGGA
Seq85	24	144	GACGGACGATTAAAGTTGGGCATG
Seq86	21	104	ATATGAATGTGGAAAATGCTA
Seq87	24	490	TCGGCCTCGTGGATGGACCAGGAG
Seq88	21	171	TTAGGATTCAATCCTTGCTGC
Seq89	21	415	TCAGGAGAGATGACACCGACA
Seq90	24	107	ACTAGGTTTGTTTATTTTTGGACG
Seq91	24	160	ACTAGGTTTGTTTATTTTGTGACG
Seq92	24	439	TAGGTTTGTTTATTTTGGGACGGA
Seq93	24	108	TAAGTTTGGACTTAAATTTGGTAA
Seq94	24	170	ATGTATAAAATTCTGAGGATGTTA
Seq95	21	101	TCAACGGCGTCATCTATTAAA
Seq96	24	262	AAGGATGACTTGCCGATCGATCGA
Seq97	24	205	ATTAGACCTAGTGGGCATTTATAC
Seq98	24	167	AGTGGGCATTTATACATCACAACA
Seq99	24	140	AATATATCTGTTGTTTCTCTCAAA
Seq100	21	502	TGACTAGTTACCTGTGACGGG
Seq101	24	210	GATGAATGGTCAAACGTTGGACAA
Seq102	24	116	GAATAAGACGAACGGTCAAACATG
Seq103	21	108	TTGTTTCACCTAGGACGAGGA
Seq104	24	206	AAATGCTAGAATGACTTACATTGT
Seq105	24	127	ATGCTAGAATGACTTACATTGTGA
Seq106	21	344	TAGAATGACTTACATTGTGAA
Seq107	24	123	AGAAAGTCTTACATTGTGAAACGG
Seq108	24	101	AAATTTTTCAAATAAGACGGACGG
Seq109	21	121	AAGTTGCTATATTTTGGGACG
Seq110	24	282	AAAAAATTTCATATAAGACGGACA
Seq111	24	155	ATTCTAATATAATGAATCTGGACA
Seq112	21	108	ATCTATATGAATGTGGGCAAT
Seq113	24	133	TTGACTTTTTAGCACATGTTTGAC
Seq114	21	156	ACAGGGATGAGGCAGAGCATG
Seq115	21	873	CAGGGATGAGGCAGAGCATGG
Seq116	21	187	AGGTCATGCTGTAGTTTCATC
Seq117	22	230	AGTGGTACTGAGAACACAGGTG
Seq118	21	326	CGGCAAGCTAGAGACAGCAAC
Seq119	21	9170	TGGGAGTTCATGAAGCGGTCA
Seq120	21	715	AAGGCATGAAGCAATGTAACA
Seq121	21	517	TGGATGTGACATACTCTAGTA
Seq122	24	246	ATTTAGTTGAATTAGAGTGGGTCA
Seq123	24	116	AACTTTTGTATGTGAATATGGACA
Seq124	21	217	TTTTTGTTTGTAACGTTTGAC
Seq125	21	129	TGTGTAGCCACATTGTAAGGG
Seq126	21	196	TTTTTAATAGATGACGCCGTT
Seq127	24	145	GTAGATCGCGTCGAGGGCTACAAG
Seq128	23	628	CAGTTACTAATTCATGATCTGGC
Seq129	24	232	AATTACACTGTAACTTGCATGTAA
Seq130	21	614	TTGCACTGCTTCATGCCTTTC
Seq131	22	215	TACAGAGAGTGAAGTTGATTAT
Seq132	21	185	TCCTTGAGGCGTCTGCTCCTG
Seq133	21	164	AGATCAGGCGCCTCAAGGATC
Seq134	21	119	TTGCGAAGTCAGGTGCTTGGG
Seq135	21	114	GAGACATCGGAGGAAATGCTA
Seq136	21	108	TTAAGTATTTTGAAAGGCTGG
Seq137	21	449	TGGTTGCGAAGTCAGGTGCTT
Seq138	24	295	GGGGATGTAGCTCAAATGGTAGAG
Seq139	22	436	ATATTCTGGTGTCCTAGGCGTA
Seq140	22	871	TGGAATGTAAAGAAGTATGGAG
Seq141	26	603	CCTAGGCGTAGAGGAACCACACCAAA
Seq142	21	130	TGAAGAAGGATGTGGACGGTG
Seq143	21	156	TCTTGACCTTGTAAGACCCAA
Seq144	21	138	TGGGAGGAGTGATAGACGCGA
Seq145	21	130	TTCTTGACCTTGCAAGACTTT
Seq146	22	125	TGGGAAGTCCTCGTGTTGCATC
Seq147	21	901	CTAACGAACGAACGATTTGAA
Seq148	21	113	CGAAACGAAAAGAATGCCTCT
Seq149	22	973	CACGACTCTCGGCAACGGATAT
Seq150	21	377	GGGGATGTAGCTCAAATGGTA
Seq151	24	138	AGAAAGAGATGACGACGCGTCGGA
Seq152	21	133	CAAATCCGATAGTCGGCTCCA
Seq153	22	480	TCAGCGATATCCATGGCTTTGA
Seq154	21	101	GACCGCATAGCGCAGTGGATT
Seq155	21	1949	ATGGTTGCGAAGTCAGGTGCT
Seq156	21	1344	TATTCTGGTGTCCTAGGCGTA
Seq157	21	156	GCGTTTGTAGTCCAACGGTTA
Seq158	21	130	ACTTATGTTCGTTGATGGCAA
Seq159	21	1409	TTTTCTATATTCTGGATTTCC
Seq160	21	1388	GAGGACGAGAAATGTTGGCAA
Seq161	21	1360	TAATCAATTTCGCTCTCTGTA
Seq162	24	969	GGGAGTATTATGAAAGGAGGTTAA
Seq163	27	418	TATCGAGTAGACCCTGTCGTTGTGAGA
Seq164	21	361	GTCTGGGTGGTGTAGTTGGTT
Seq165	21	361	CAGTACCCCAATGCAAGGGCG
Seq166	22	344	TCCGTTGTAGTCTAGCTGGTTA
Seq167	22	308	GGTGTCGTGGTGTAGTTGGTTA
Seq168	26	298	TATCGAGTAGACCCTGTCGTTGTGAG
Seq169	22	292	GTCTGGGTGGTGTAGTTGGTTA
Seq170	25	268	TCTCATGGAGAGTTCGATCCTGGCT
Seq171	21	210	GGAGAGATGGCTGAGTGGACT
Seq172	27	206	GGGTGTTTGGTCTAGTGGTATGATTCT
Seq173	21	197	GGGGGTGTAGCTCATATGGTA
Seq174	21	185	TCAAGATGATAGGGTAAACAA
Seq175	21	179	GCTTTCGTAGCTCAGTTGGTT
Seq176	24	163	GATTGAGTTATTGAGGAAAGGTGA
Seq177	26	150	AGGGATGTAGCGCAGCTTGGTAGCGC
Seq178	21	150	AAGCCACTTATACACCAGTCG
Seq179	21	150	CCTAACGAACGAACGATTTGA
Seq180	24	148	ATGTGAACTCTAATGAAGATGAAC
Seq181	21	143	TGCACTTTGCAAGTTCGTGGA
Seq182	27	132	TTCAGGTTAAGATCGATCTAAACCAAT
Seq183	23	132	AGGCGTAGAGGAACCACACCAAT
Seq184	27	126	TCCGTTGTAGTCTAGCTGGTTAGGATA
Seq185	21	124	CAGTTACTAATTCATGATCTG
Seq186	25	123	GGTGGAGCATGTGGTTTAATTCGAT
Seq187	24	121	ATTGTATCCTTAACCATTTCTTTT
Seq188	26	120	AGGTTCGAGTCCTCTTCAAGGCACCA
Seq189	25	117	TGGTGAACTGATGACAGGGAAGCCG
Seq190	25	113	GGGCCTGTAGCTCAGAGGATTAGAG
Seq191	24	112	AAGCAACTATTGTATGAATTGGCT
Seq192	24	109	ACATAGGGTGTAGATTGTGGGTGC
Seq193	23	109	TTCGGGACCTGCATGGGCCACCA
Seq194	24	108	GGGGATATAGCTCAGTTGGTAGAG
Seq195	24	108	AATCTAGTCTATTGTTGAGGTGTA
Seq196	23	108	TAACTGGAATAAAAGAATTAGAA
Seq197	23	104	AACTTTGTACCGCGTGCATTACT
Seq198	22	100	TCCTAACGAACGAACGATTTGA
Seq199	21	1002	TAAGTATTTTGAAAGGCTGGA
Seq200	26	1045	TGTCGTGCCAATCCAACATAAGCCTT
Seq201	21	1722	TTGGTGAGTGACGCAAGAGAA
Seq202	21	6313	TGAGGAATCACTAGTAGTCGT
Seq203	26	589	CAGTTCAAATCTGGTTCCTGGCACCA
Seq204	22	227	TGGAGTGTGACAATGGTGTTTG
Seq205	21	229	ACACGACTCTCGGCAACGGAT
Seq206	22	135	GCAAGATATTGGGTATTTCTTA
Seq207	21	107	TTCGGACTCTTCGGAGAAGAA
Seq208	21	307	TTGATGGTTATTTCGTAGGTA
Seq209	21	119	ATTGATGGTTATTTCGTAGGT
Seq210	24	110	ATGACTGAACGCCTCTAAGTCAGA
Seq211	23	341	GCGACCCCAGGTCAGGCGGGACT
Seq212	21	170	TAGAATACCCGTCGGTAGCGT
Seq213	21	137	CGTGTCCCGGCAACGGAACCA
Seq214	21	135	TTCGACATTAGTAGCGAGCTA
Seq215	21	123	ATCTTAGATGAGATCGACGGA
Seq216	21	119	CGGGTCCCGGCAACGGAACCA
Seq217	22	115	TAATACACAGGAACTCGTGGGA
Seq218	22	107	ATCTTAGATGAGATCGACGGAT
Seq219	22	105	AAGCATAGGATCAACTCTTGGA
Seq220	21	100	GTAATGATTAATAGGGACAGT
Seq221	21	111	TAATAATTCTATCCGATGGCT
Seq222	21	306	GGGGATATGGCGAAATCGGTA
Seq223	27	267	GTAGGTGAACCTGCGGAAGGATCATTG
Seq224	26	237	GCAGTTAAAAAGCTCGTAGTTGGACC
Seq225	21	213	TTTGACGATCAGGAAGAAGGG
Seq226	25	194	GGTTCAAATCCGATAGTCGGCTCCA
Seq227	21	172	TTCAAGATGATAGGGTAAACA
Seq228	23	171	GGGATTGTAGTTCAATTGGTCAG
Seq229	25	162	AGGTGAACCTGCGGAAGGATCATTG
Seq230	22	128	TCATCATCCGAGGTACGGTATA
Seq231	21	104	AGAGAGATGACAACAGCTGGA
Seq232	22	103	TGTCATCATCCGAGGTACGGTA
Seq233	22	102	GGAGAGATGGCTGAGTGGTTGA
Seq234	22	162	TAGAGCTATGCTATTGCGGACA
Seq235	25	150	GGTTCGTGACCTGCATGGGCCACCA
Seq236	24	135	ATCTTAGGGCAAGTATATTAGGTG
Seq237	21	393	GGTGTCGTGGTGTAGTTGGTT
Seq238	25	219	GGGCTATTAGCTCAGTGGTAGAGCG
Seq239	24	116	ACCCTATATGTAGCTTGCACGAAT
